# Supplementary material
Source: publisher figshare collection journal article supplement (https://acs.figshare.com/ndownloader/files/4073032)
Supplement: Supplementary file 1 [file 4073032]

## **The Effect of Functional Groups on the Sensing Properties of Silicon Nanowires towards Volatile Compounds**

Bin Wang and Hossam Haick\*

*The Department of Chemical Engineering and Russell Berrie Nanotechnology Institute, Technion-Israel  
Institute of Technology, Haifa 3200003, Israel*

### **Synthesis of 5-phenylvaleric chloride:**

Phenylvaleric acid (2g) was dissolved in 10 mL  $\text{CH}_2\text{Cl}_2$  in a two-neck flask at room temperature. Then thionyl chloride ( $\text{SOCl}_2$ , 4 mL) and 1 drop of N,N-Dimethylformamide (DMF) were added. The mixture was reflux stirred for 17 h under the protection of a dry tube. Excess  $\text{SOCl}_2$  and  $\text{CH}_2\text{Cl}_2$  were removed by rotary evaporation. After evaporation of volatiles, the phenylvaleric chloride was obtained as a red liquid.

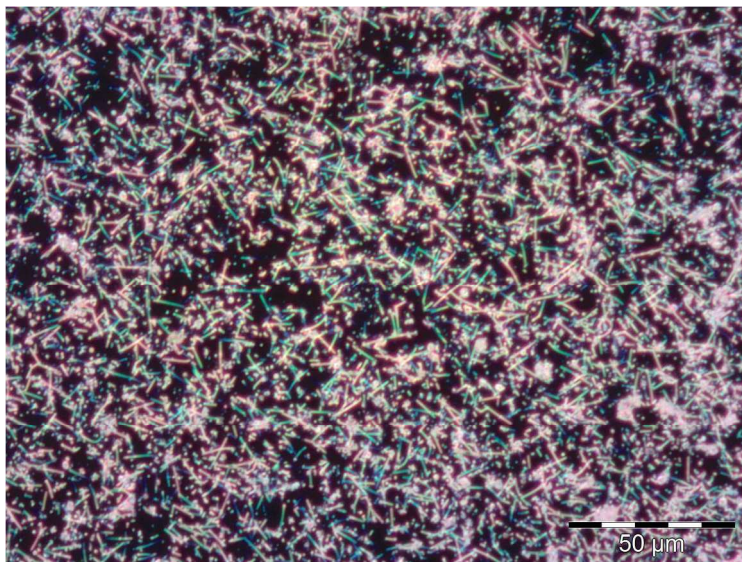

**Figure S1.** Typical dark field optical microscope image of spray coated SiNW mat.

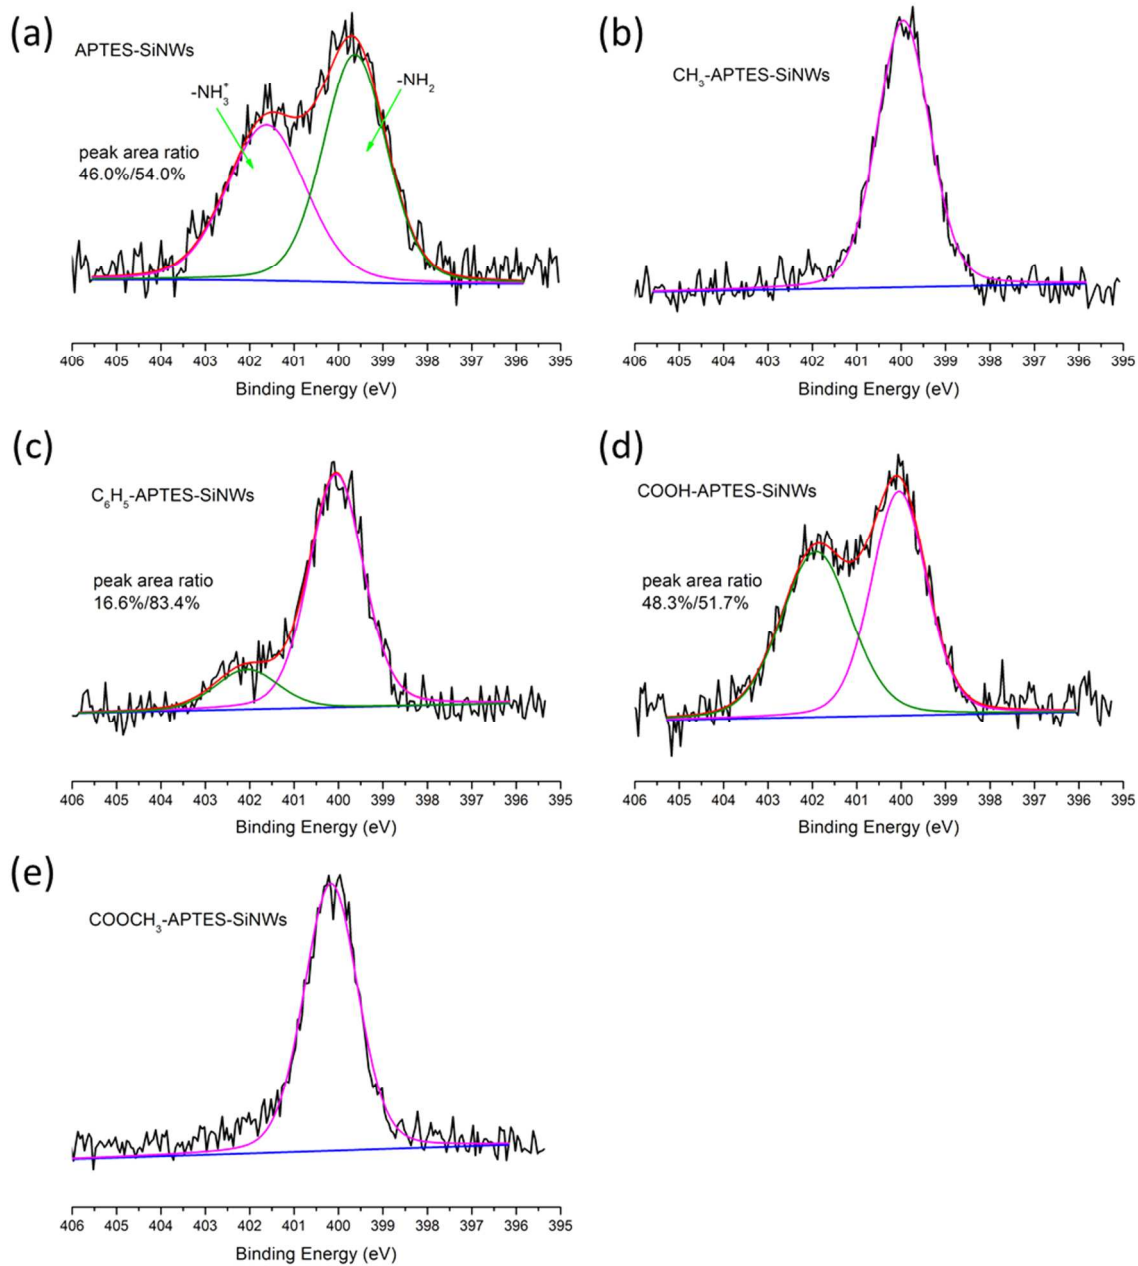

**Figure S2.** XPS N1s spectra of (a) APTES-SiNWs; (b)  $\text{CH}_3$ -APTES-SiNWs; (c)  $\text{C}_6\text{H}_5$ -APTES-SiNWs; (d)  $\text{COOH}$ -APTES-SiNWs; and (e)  $\text{COOCH}_3$ -APTES-SiNWs.

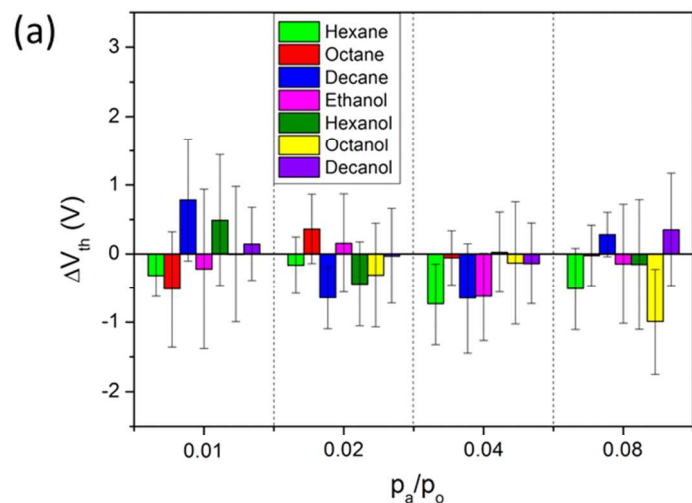

**Figure S3. (a)**  $\Delta V_{th}$ ; and  
(b)  $\Delta \mu_h$  of bare Si NW  
FET upon exposure to  
various concentrations of  
polar and nonpolar VOCs

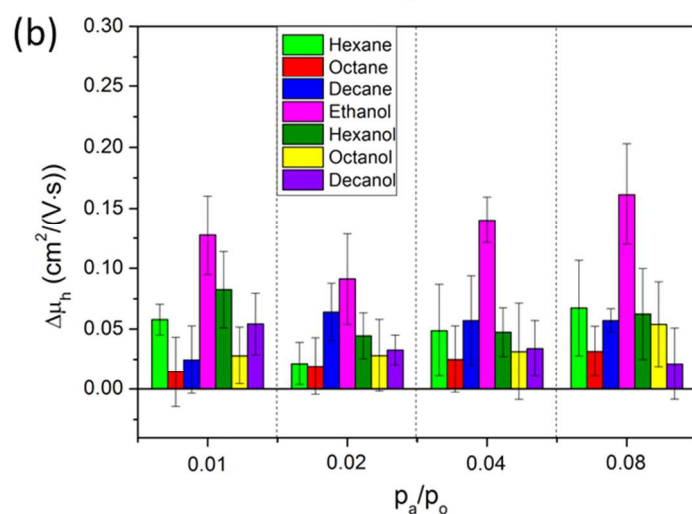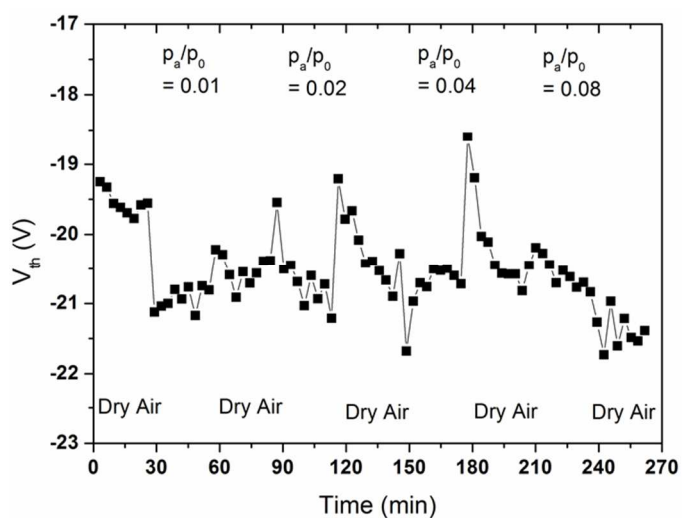

**Figure S4.** Plot of  $V_{th}$  versus  
time of COOH-SiNW FET  
upon exposure to various  
concentrations of hexanol.
